# Supplementary material for: Active faulting, 3-D basin architecture and Plio-Quaternary structural evolution of extensional basins: a 4-D perspective on the central Apennine chain evolution, Italy
Source: Copernicus journal article supplement (doi:10.5194/se-2016-103), 2016-07-21
Supplement: Supplementary file 1 [file se-2016-103-supplement.pdf]

Horizontal-to-Vertical Spectral Ratio of ambient noise measurements performed in the Subequana Valley

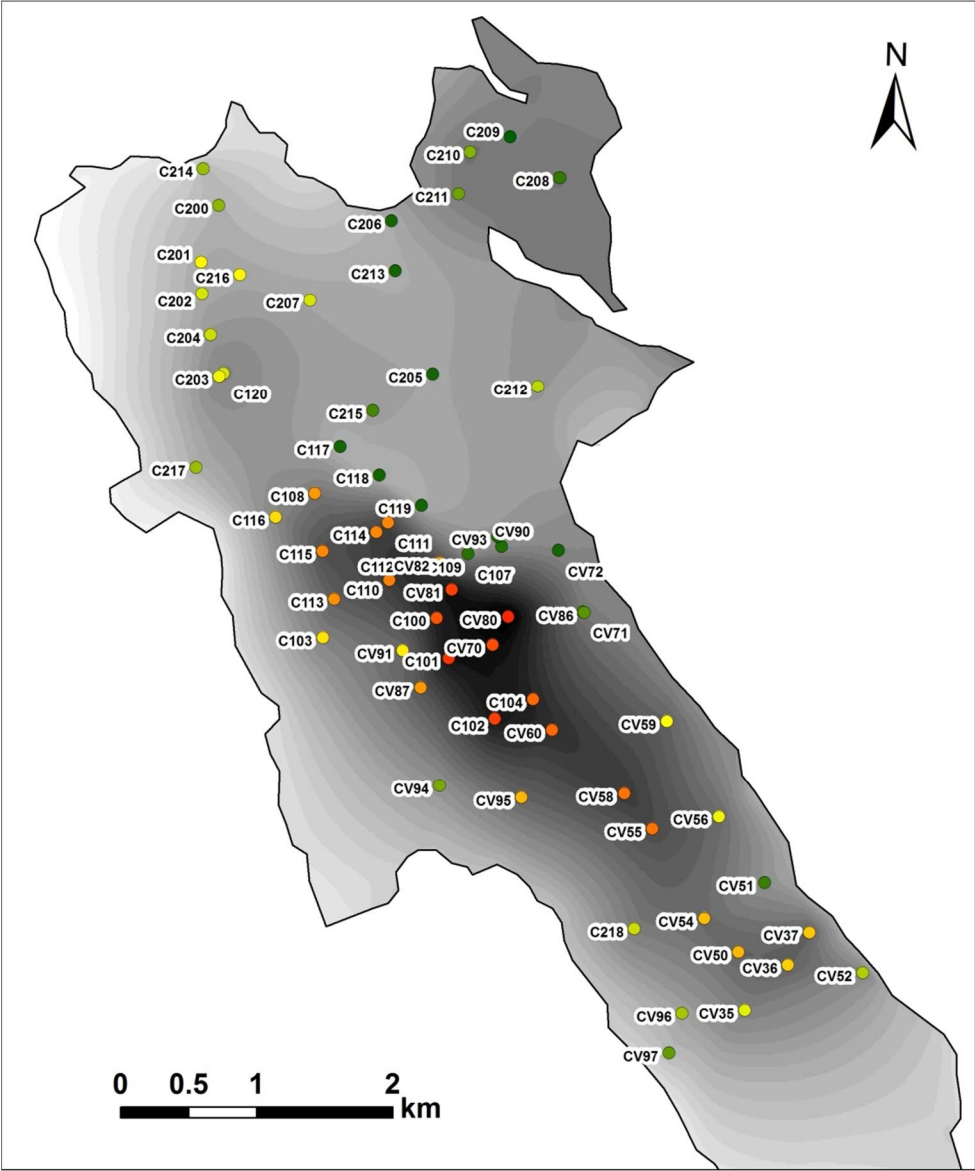

Figure S1. Detailed map of NHVSR. Labels of each point show the code of the measurement.

| CODE | LON (°E)  | LAT (°N)  | SE (m) | F0 (Hz) | ST (m) | BE (m) |
|------|-----------|-----------|--------|---------|--------|--------|
| CV35 | 13.745432 | 42.099074 | 554    | 1.3     | 94     | 460    |
| CV36 | 13.749206 | 42.102086 | 536    | 1.0     | 135    | 401    |
| CV37 | 13.751063 | 42.104265 | 527    | 1.0     | 138    | 389    |
| CV50 | 13.744784 | 42.102911 | 550    | 0.9     | 150    | 400    |
| CV51 | 13.747010 | 42.107504 | 519    | 6.4     | 14     | 505    |
| CV52 | 13.755848 | 42.101649 | 538    | 1.6     | 73     | 465    |
| CV54 | 13.741700 | 42.105100 | 558    | 1.0     | 140    | 418    |
| CV55 | 13.736983 | 42.110967 | 557    | 0.7     | 210    | 347    |
| CV56 | 13.742875 | 42.111837 | 510    | 1.3     | 96     | 414    |
| CV58 | 13.734437 | 42.113263 | 517    | 0.7     | 210    | 307    |
| CV59 | 13.738119 | 42.118129 | 497    | 1.3     | 99     | 398    |
| CV60 | 13.727933 | 42.117433 | 515    | 0.6     | 230    | 285    |
| CV70 | 13.722538 | 42.123003 | 503    | 0.5     | 277    | 226    |
| CV71 | 13.730534 | 42.125283 | 477    | 3.8     | 26     | 451    |
| CV72 | 13.728257 | 42.129289 | 479    | 888.0   | 0      | 479    |
| CV80 | 13.723891 | 42.124848 | 494    | 0.5     | 319    | 175    |
| CV81 | 13.718812 | 42.126598 | 503    | 0.5     | 283    | 220    |
| CV82 | 13.717740 | 42.128352 | 504    | 0.9     | 160    | 344    |
| CV86 | 13.730638 | 42.125227 | 477    | 3.7     | 27     | 450    |
| CV87 | 13.716200 | 42.120100 | 538    | 0.8     | 165    | 373    |
| CV90 | 13.723193 | 42.129504 | 488    | 27.0    | 2      | 486    |
| CV91 | 13.714563 | 42.122521 | 534    | 1.1     | 113    | 421    |
| CV93 | 13.722846 | 42.130133 | 514    | 888.0   | 0      | 514    |
| CV94 | 13.718033 | 42.113633 | 545    | 2.7     | 39     | 506    |
| CV95 | 13.725315 | 42.112908 | 552    | 0.9     | 150    | 402    |
| CV96 | 13.739860 | 42.098806 | 605    | 1.8     | 67     | 538    |
| CV97 | 13.738740 | 42.096178 | 612    | 3.6     | 29     | 583    |
| C100 | 13.717526 | 42.124717 | 515    | 0.6     | 260    | 255    |
| C101 | 13.718662 | 42.122055 | 517    | 0.5     | 290    | 227    |
| C102 | 13.722836 | 42.118125 | 519    | 0.5     | 283    | 236    |
| C103 | 13.707438 | 42.123308 | 586    | 1.1     | 118    | 468    |
| C104 | 13.726197 | 42.119442 | 497    | 0.6     | 230    | 267    |
| C107 | 13.720227 | 42.128971 | 495    | 20.0    | 4      | 491    |
| C108 | 13.706522 | 42.132807 | 606    | 0.8     | 165    | 441    |
| C109 | 13.715775 | 42.129429 | 514    | 0.9     | 158    | 356    |
| C110 | 13.713288 | 42.127162 | 520    | 0.7     | 206    | 314    |
| C111 | 13.713073 | 42.130940 | 527    | 0.7     | 203    | 324    |
| C112 | 13.714536 | 42.128258 | 515    | 0.6     | 244    | 271    |
| C113 | 13.708406 | 42.125860 | 564    | 0.8     | 173    | 391    |
| C114 | 13.712050 | 42.130310 | 525    | 0.7     | 203    | 322    |
| C115 | 13.707298 | 42.129003 | 561    | 0.7     | 203    | 358    |
| C116 | 13.703097 | 42.131193 | 611    | 1.0     | 132    | 479    |
| C117 | 13.708730 | 42.135905 | 572    | 888.0   | 0      | 572    |
| C118 | 13.712253 | 42.134073 | 573    | 888.0   | 0      | 573    |
| C119 | 13.716033 | 42.132110 | 555    | 888.0   | 0      | 555    |
| C120 | 13.698258 | 42.140700 | 558    | 1.4     | 88     | 470    |

|      |           |           |     |       |     |     |
|------|-----------|-----------|-----|-------|-----|-----|
| C200 | 13.697617 | 42.151798 | 609 | 2.5   | 44  | 565 |
| C201 | 13.696123 | 42.148007 | 656 | 1.2   | 106 | 550 |
| C202 | 13.696225 | 42.145946 | 635 | 1.4   | 88  | 547 |
| C203 | 13.697865 | 42.140488 | 569 | 1.3   | 96  | 473 |
| C204 | 13.697075 | 42.143255 | 597 | 1.5   | 81  | 516 |
| C205 | 13.716855 | 42.140835 | 540 | 888.0 | 0   | 540 |
| C206 | 13.712996 | 42.150955 | 554 | 888.0 | 0   | 554 |
| C207 | 13.705846 | 42.145635 | 628 | 1.4   | 88  | 540 |
| C208 | 13.727880 | 42.153963 | 448 | 8.5   | 10  | 438 |
| C209 | 13.723415 | 42.156603 | 464 | 888.0 | 0   | 464 |
| C210 | 13.719905 | 42.155585 | 475 | 2.6   | 42  | 433 |
| C211 | 13.718920 | 42.152801 | 484 | 3.3   | 31  | 453 |
| C212 | 13.726218 | 42.140116 | 587 | 1.6   | 75  | 512 |
| C213 | 13.713383 | 42.147640 | 558 | 888.0 | 0   | 558 |
| C214 | 13.696198 | 42.154213 | 627 | 2.0   | 57  | 570 |
| C215 | 13.711580 | 42.138333 | 544 | 4.2   | 23  | 521 |
| C216 | 13.699580 | 42.147238 | 646 | 1.2   | 106 | 540 |
| C217 | 13.695946 | 42.134403 | 617 | 2.0   | 57  | 560 |
| C218 | 13.735505 | 42.104333 | 533 | 1.5   | 81  | 452 |

**Table S1. Noise measurements. CODE: code of the measurement. LON: longitude. LAT: latitude. SE: Surface elevation. F0: fundamental frequency of the NHVSR. ST: sediment thickness. BE: Bedrock elevation.**

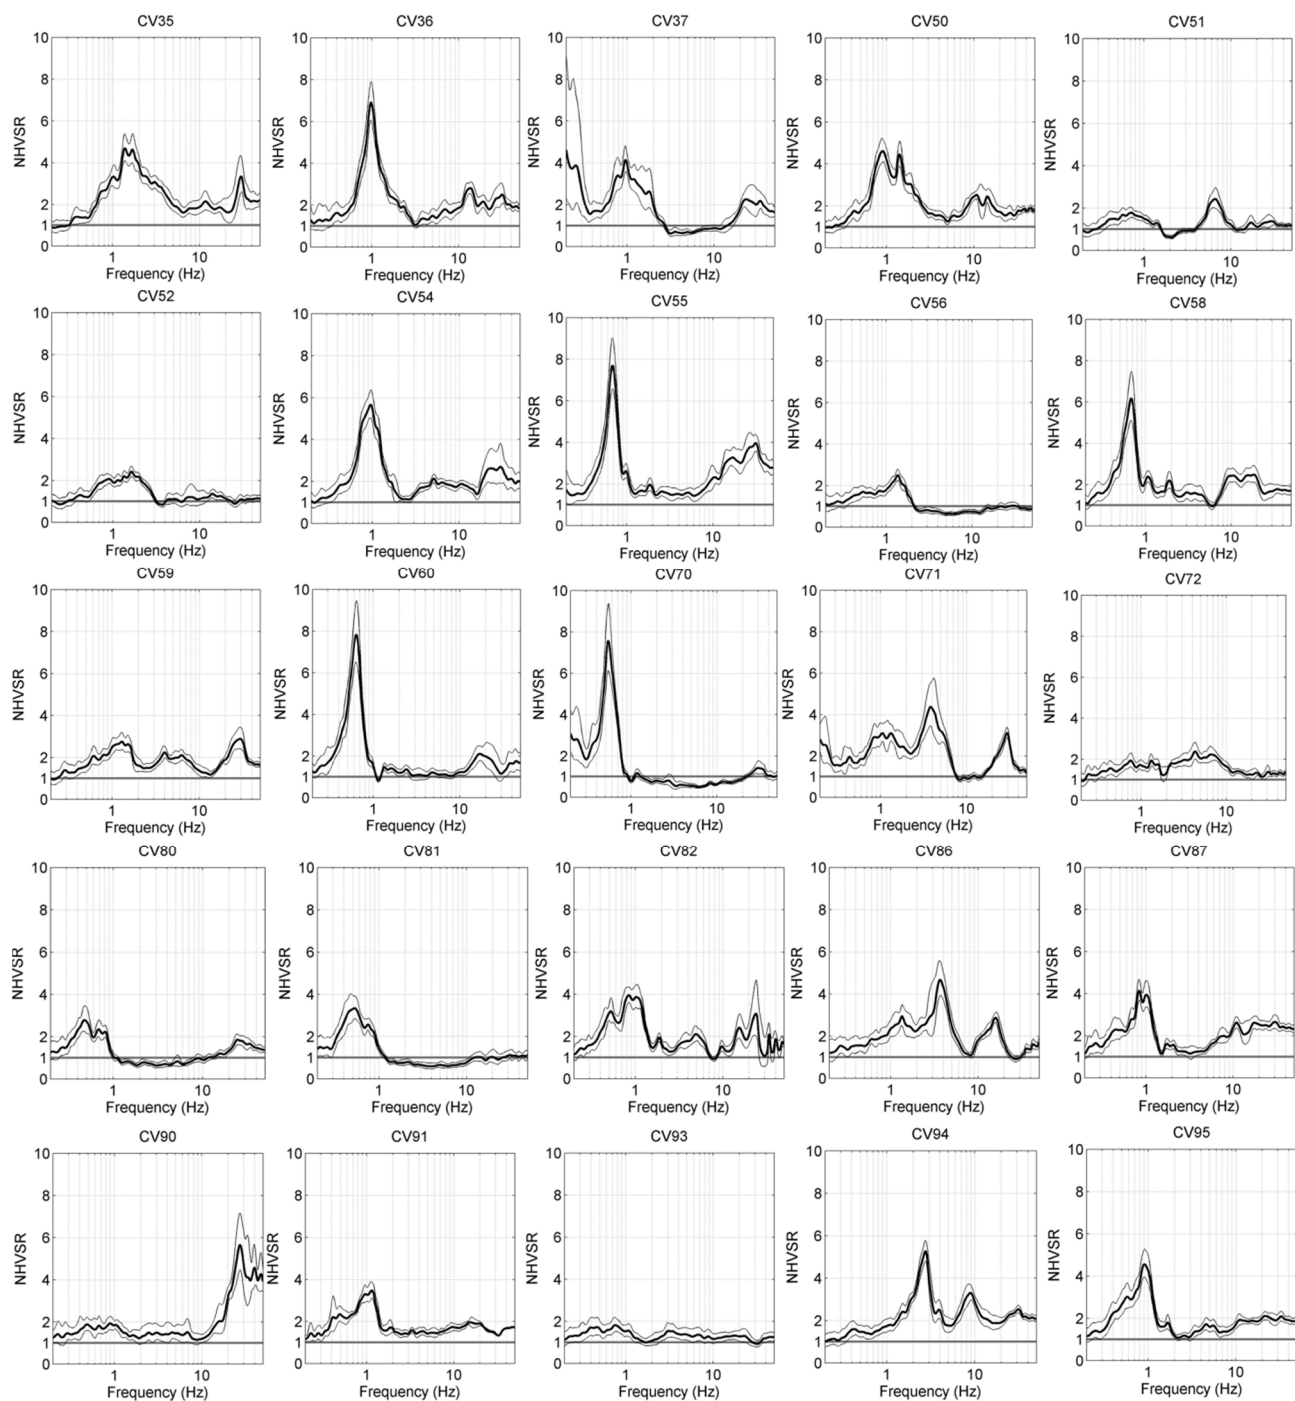

**Figure S2 (continue). NHVSR performed in the Subequana Valley. The code over each panel refers to Figure S1 and Table S1.**

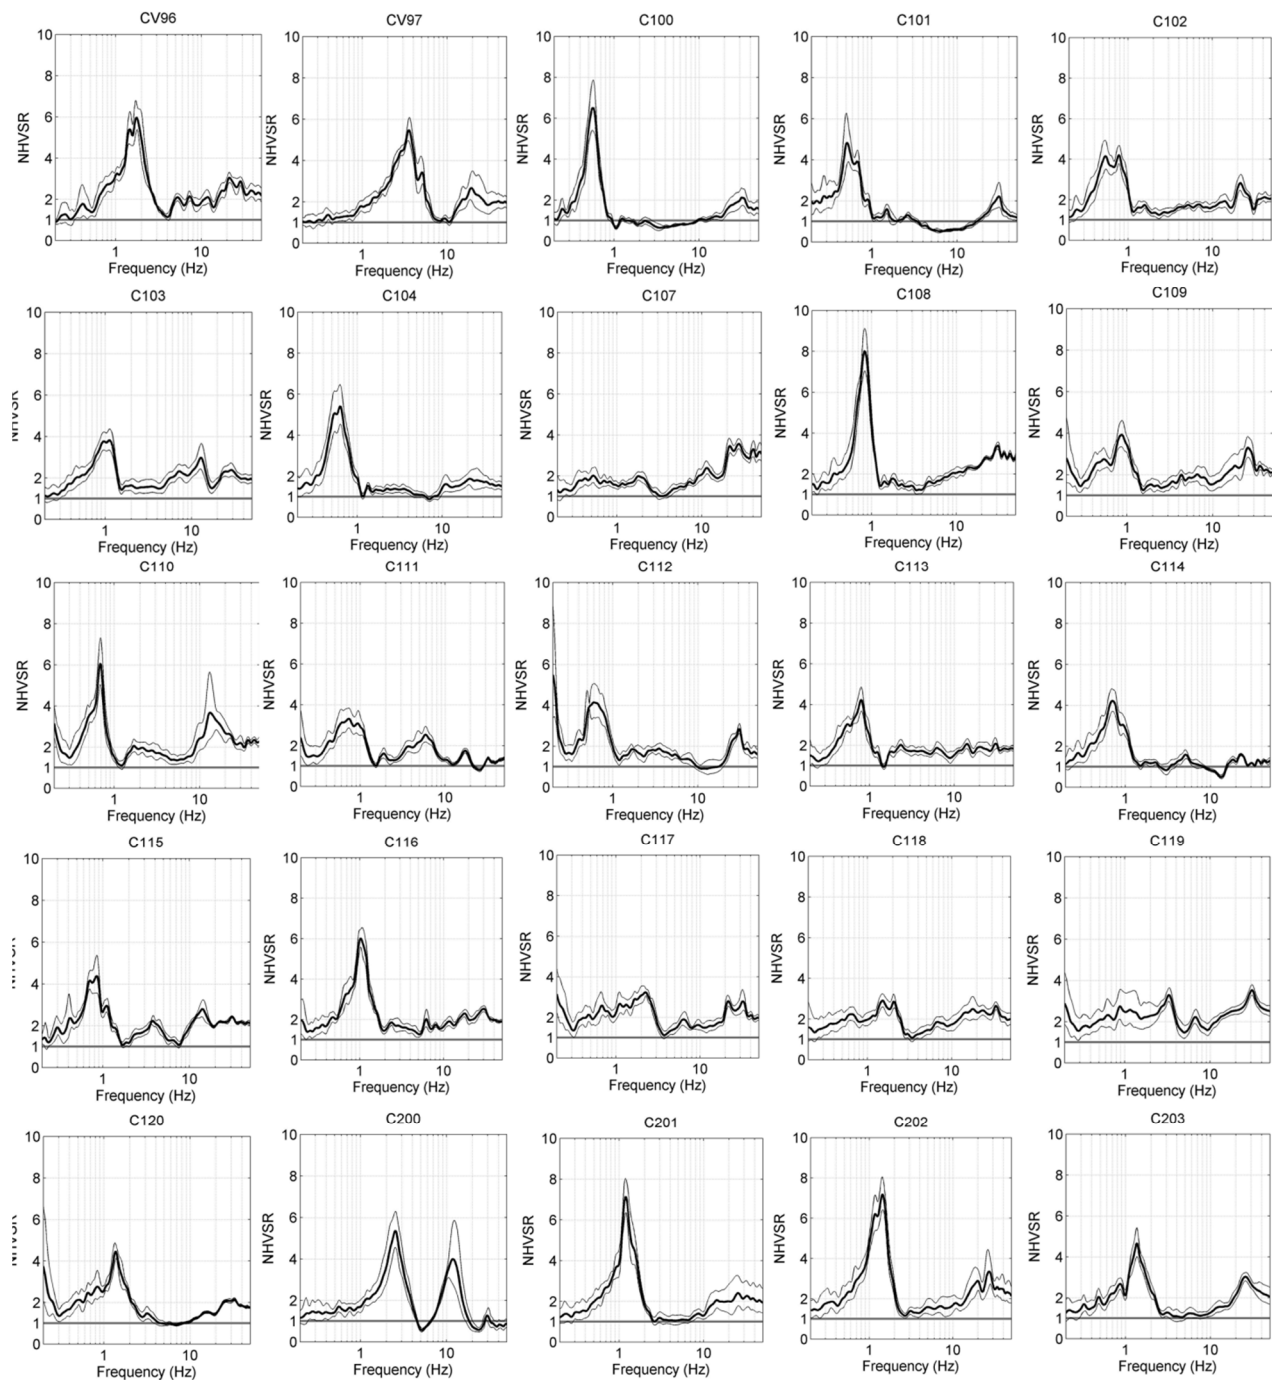

**Figure S2 (continue). NHVSR performed in the Subequana Valley. The code over each panel refers to Figure S1 and Table S1.**

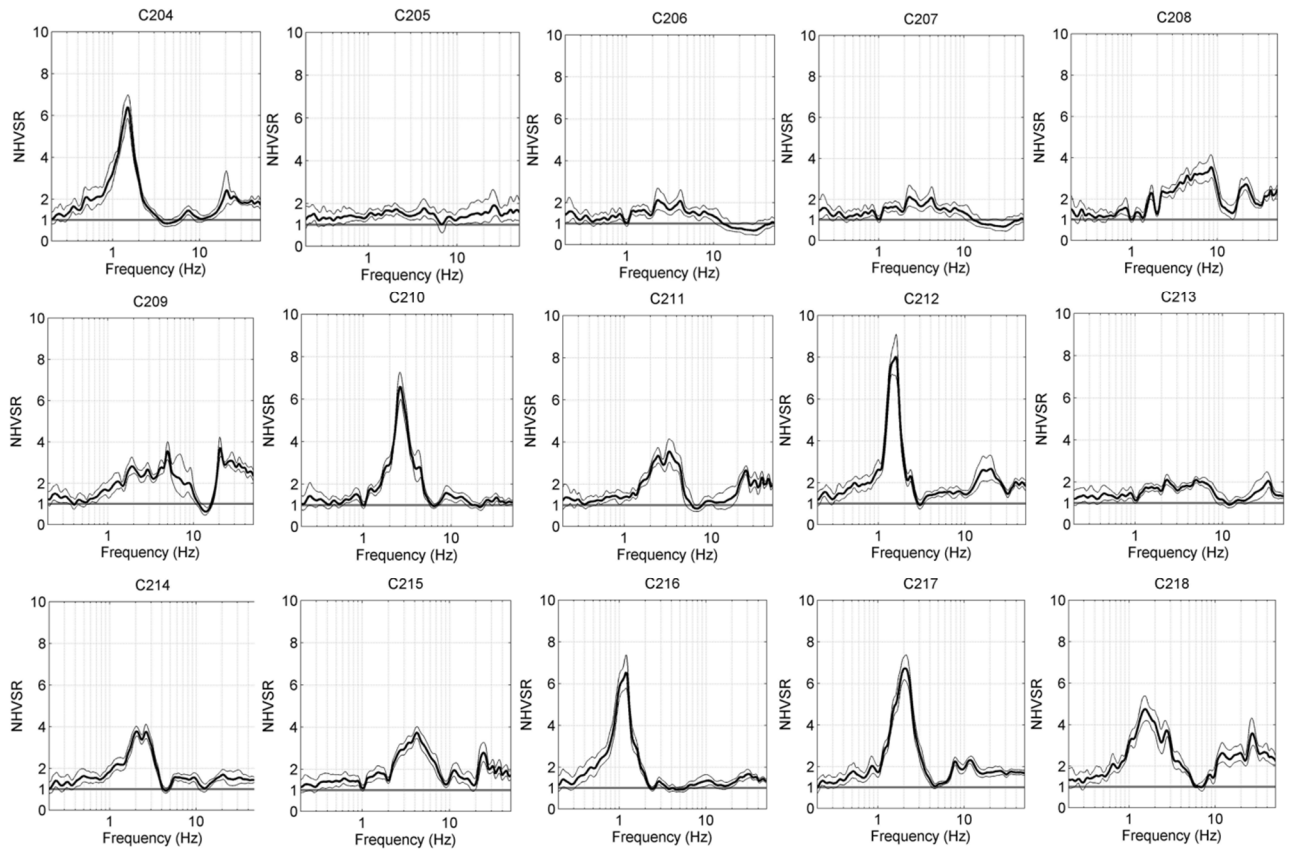

**Figure S2 (continue).** NHVSR performed in the Subequana Valley. The code over each panel refers to Figure S1 and Table S1.
